# Supplementary material for: Controlled intracellular self-assembly of gadolinium nanoparticles as smart molecular MR contrast agents
Source: PubMed Central journal article supplement — Sci Rep. 2013 Jan 3;3:1024. doi: 10.1038/srep01024 (PMC3535584; doi:10.1038/srep01024), 2013-01-03
Supplement: srep01024-s1.pdf [file srep01024-s1.pdf]

## Supplementary Information

### Controlled intracellular self-assembly of gadolinium nanoparticles as smart molecular MR contrast agents

Chun-Yan Cao<sup>1,4</sup>, Ying-Ying Shen<sup>2,4</sup>, Jian-Dong Wang<sup>3</sup>, Li Li<sup>2,\*</sup> & Gao-Lin Liang<sup>1,\*</sup>

<sup>1</sup>CAS Key Laboratory of Soft Matter Chemistry, Department of Chemistry, University of Science and Technology of China, 96 Jinzhai Road, Hefei, Anhui 230026, China

<sup>2</sup>State Key Laboratory of Oncology in Southern China, Imaging Diagnostic and Interventional Center, Cancer Center, Sun Yet-sen University, 651 Dongfeng Road East, Guangzhou 510060, China

<sup>3</sup>Laboratory of Molecular Pathology and Molecular Imaging, Department of Pathology, Nanjing Jinling Hospital, Nanjing University School of Medicine, 305 Zhong Shan Dong Lu, Nanjing 210002, China

<sup>4</sup>These authors contributed equally to this work

\*Correspondence should be addressed to L. L. (li2@mail.sysu.edu.cn) or G. L. L. (gliang@ustc.edu.cn).

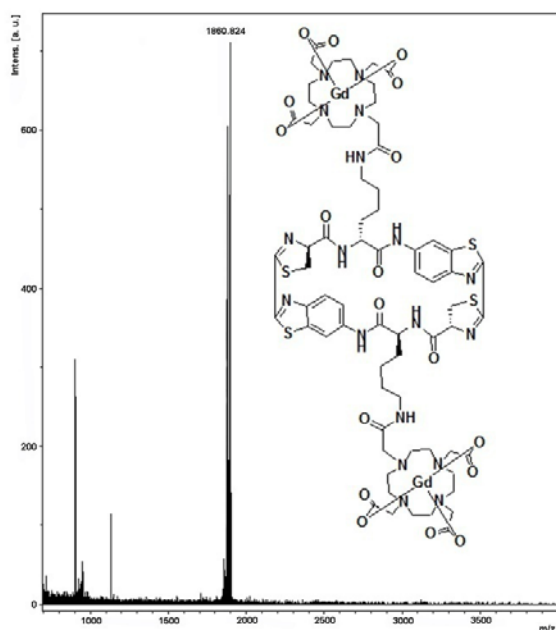

**1-D-1**

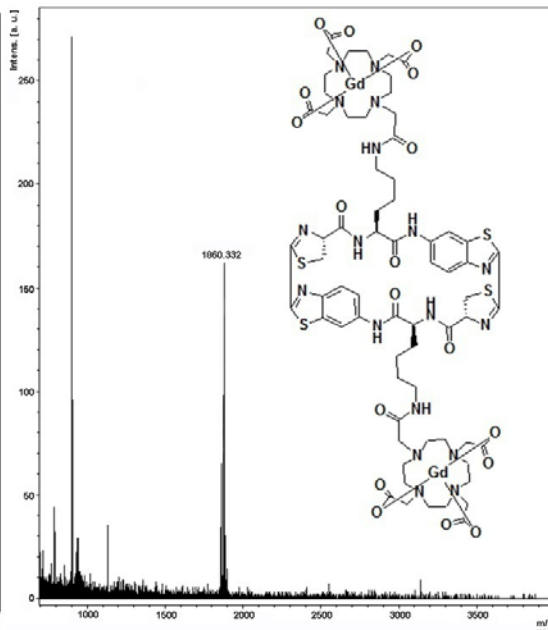

**1-D-2**

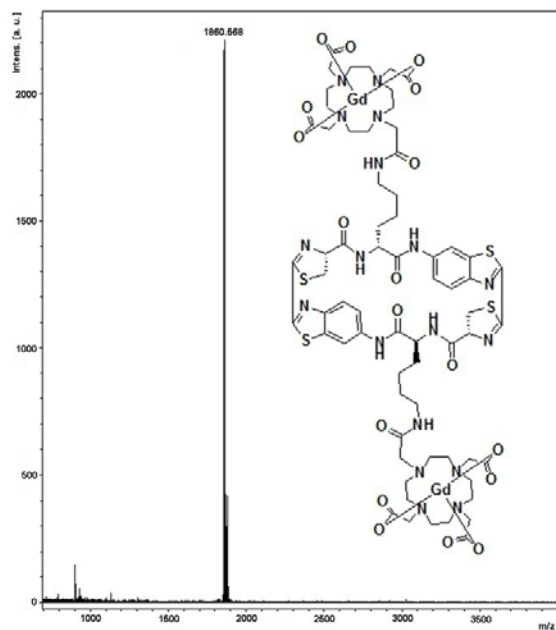

**1-D-3**

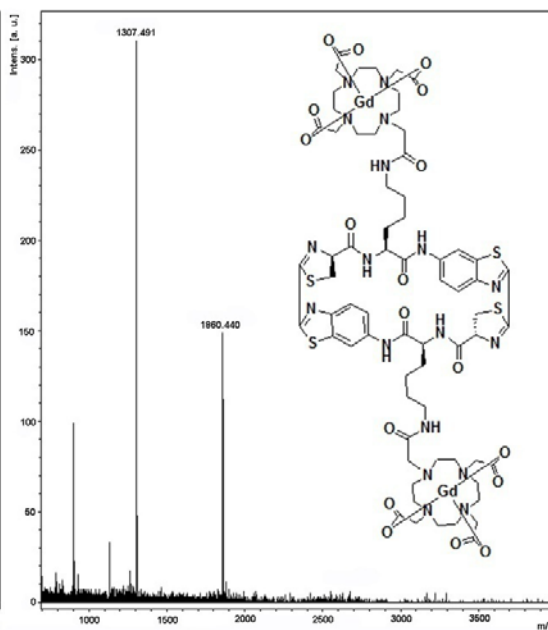

**1-D-4**

**Figure S1.** MALDI mass spectra of HPLC peaks at 38.2 min (**1-D-1**), 39.5 min (**1-D-2**), 40.5 min (**1-D-3**), and 42.8 min (**1-D-4**) in Fig. 3a respectively.

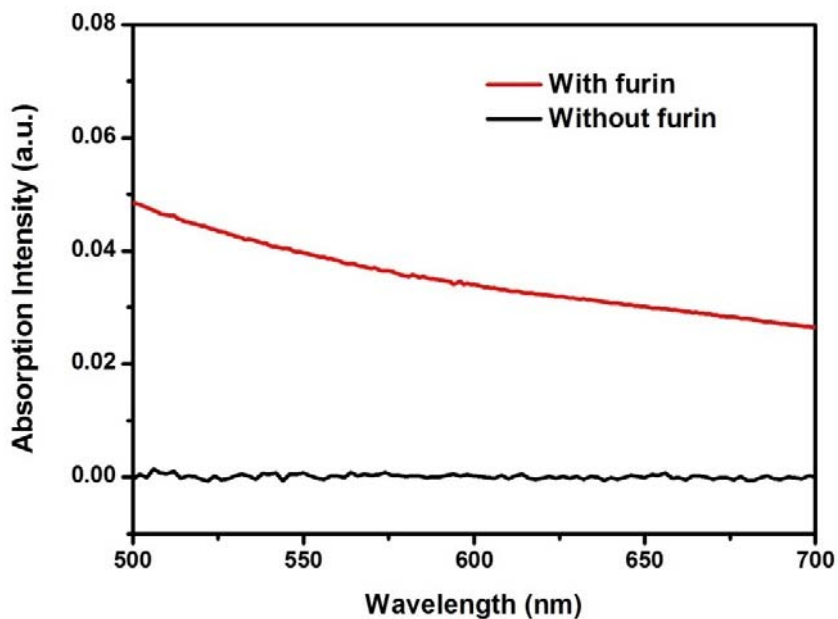

**Figure S2.** Absorption spectra (500-700 nm due to the light scattering) of **1** at 100  $\mu$ M without furin (black) or incubated with furin at 1 nmol/U, pH 7.4, and 30  $^{\circ}$ C for 17 h (red).

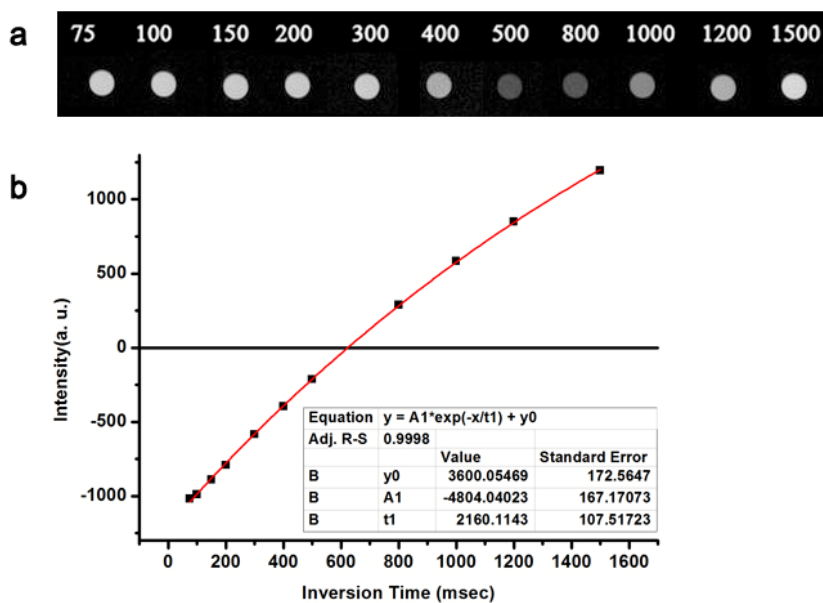

**Figure S3.** Plotted curves and fitting results of signal intensity versus inversion time of phosphate buffer (pH 7.4, 0.2 M) on a 1.5 T MR scanner.

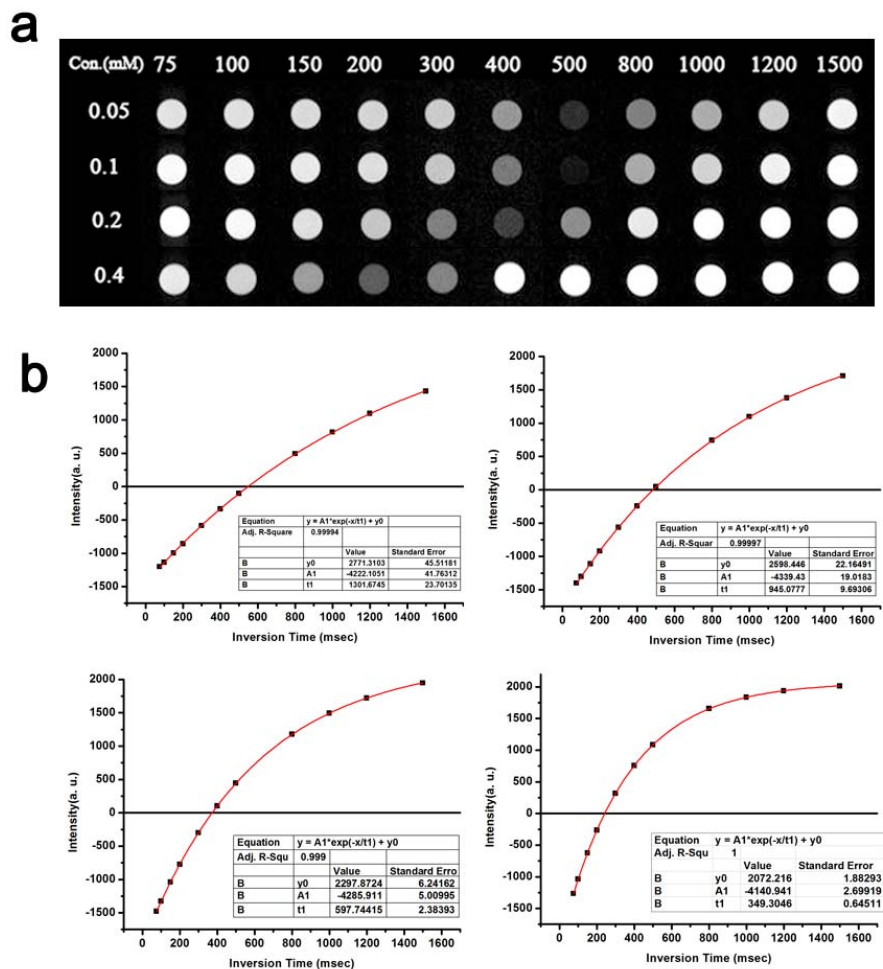

**Figure S4.** (a)  $T_1$ -weighted MR phantom images of **1** at 0.05 mM (first lane), 0.1 mM (second lane), 0.2 mM (third lane), 0.4 mM (fourth lane) in 0.2 M PB buffer (pH 7.4). Images were obtained on a 1.5 T MR scanner and the inversion time (ms) are shown above the phantom images. (b) Plotted curves and fitting results of signal intensity versus inversion time from Fig. S4a of different lanes: first lane (upper left), second lane (upper right), third lane (bottom left), fourth lane (bottom right).

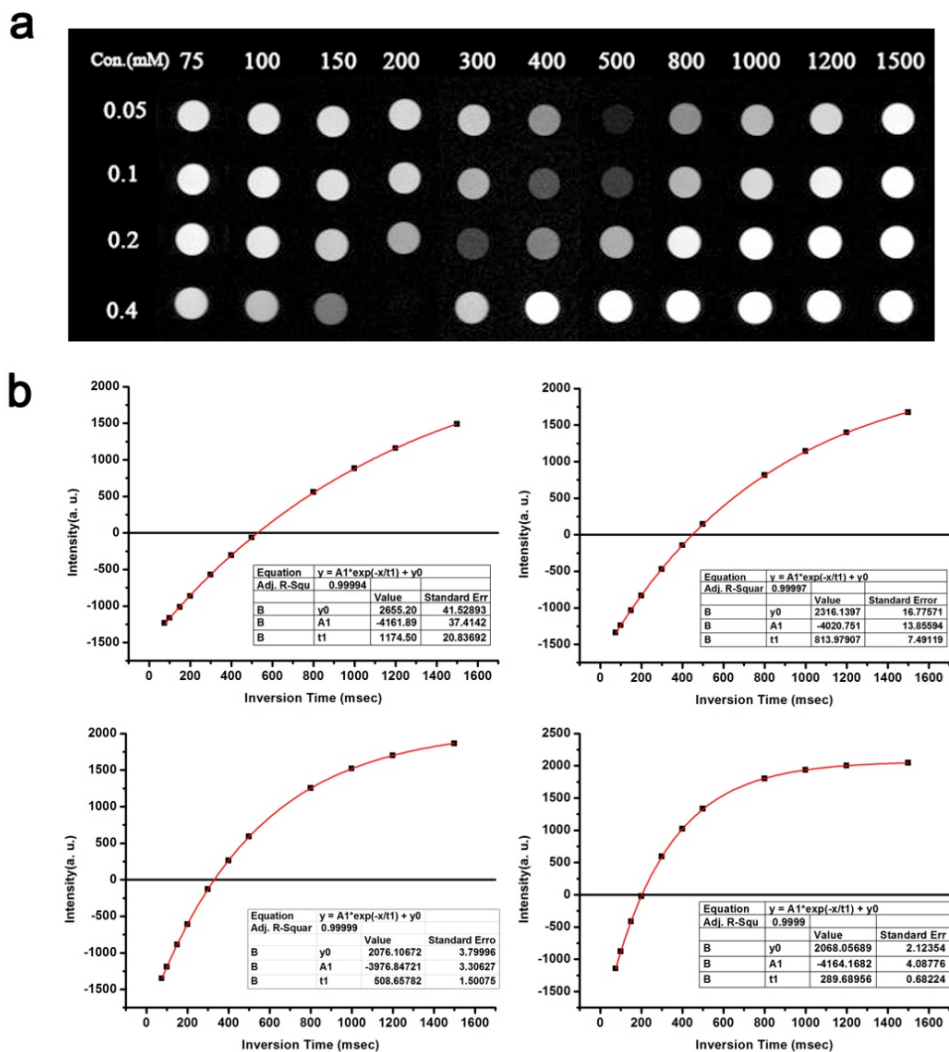

**Figure S5.** (a)  $T_1$ -weighted MR phantom images of **1-Scr** at 0.05 mM (first lane), 0.1 mM (second lane), 0.2 mM (third lane), 0.4 mM (fourth lane) in 0.2 M PB buffer (pH 7.4). Images were obtained on a 1.5 T MR scanner and the inversion time (ms) are shown above the phantom images. (b) Plotted curves and fitting results of signal intensity versus inversion time from Fig. S5a of different lanes: first lane (upper left), second lane (upper right), third lane (bottom left), fourth lane (bottom right).

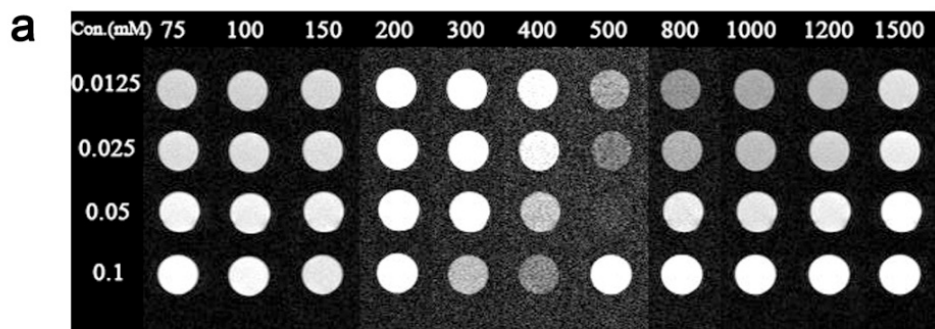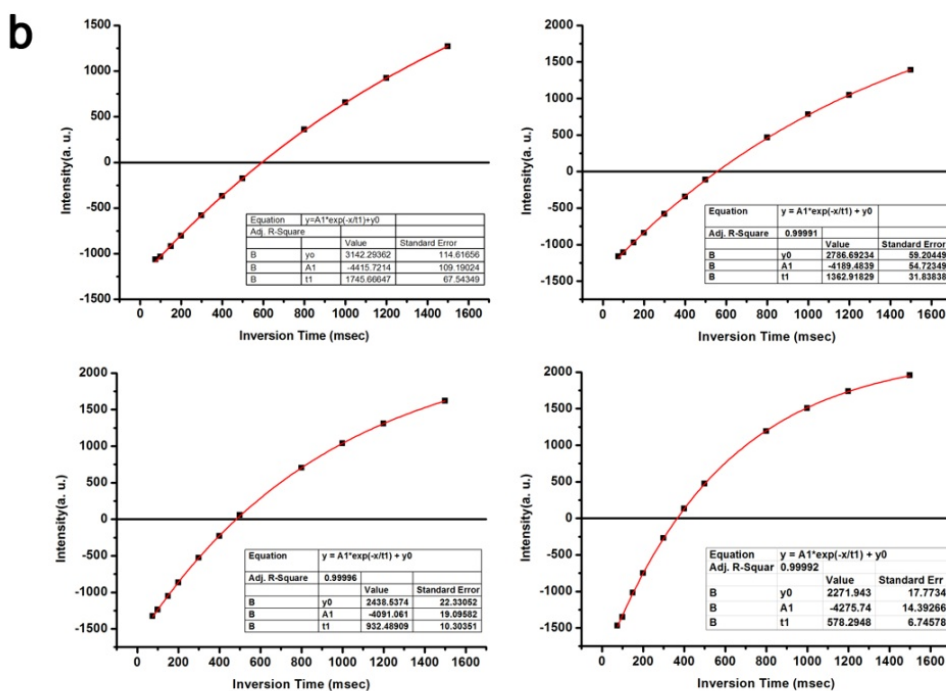

**Figure S6.** (a)  $T_1$ -weighted MR phantom images of **1-D** at 0.0125 mM (first lane), 0.025 mM (second lane), 0.05 mM (third lane), 0.1 mM (fourth lane) in 0.2 M PB buffer (pH 7.4, 1.5% DMSO). Images were obtained on a 1.5 T MR scanner and the inversion time (ms) are shown above the phantom images. (b) Plotted curves and fitting results of signal intensity versus inversion time from Fig. S6a of different lanes: first lane (upper left), second lane (upper right), third lane (bottom left), fourth lane (bottom right).

**a**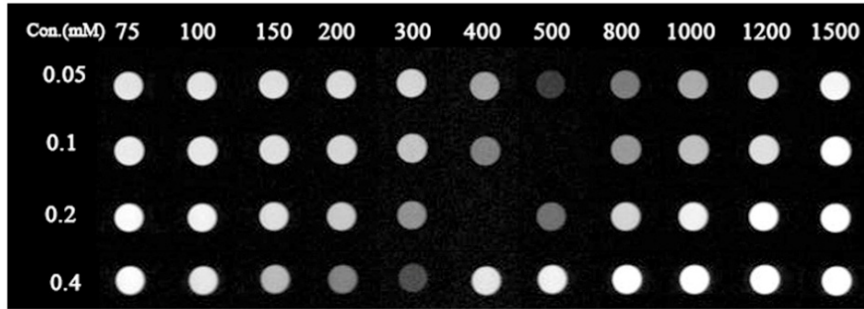**b**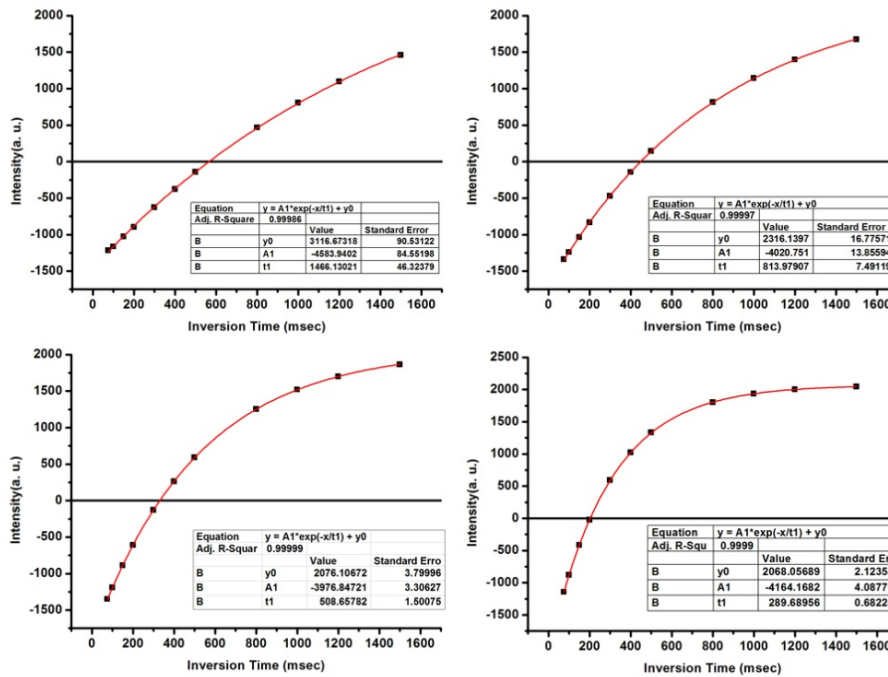

**Figure S7. (a)**  $T_1$ -weighted MR phantom images of Gd-DTPA (Magnevist) at 0.05 mM (first lane), 0.1 mM (second lane), 0.2 mM (third lane), 0.4 mM (fourth lane) in 0.2 M PB buffer (pH 7.4). Images were obtained on a 1.5 T MR scanner and the inversion time (ms) are shown above the phantom images. **(b)** Plotted curves and fitting results of signal intensity versus inversion time from Fig. S7a of different lanes: first lane (upper left), second lane (upper right), third lane (bottom left), fourth lane (bottom right).

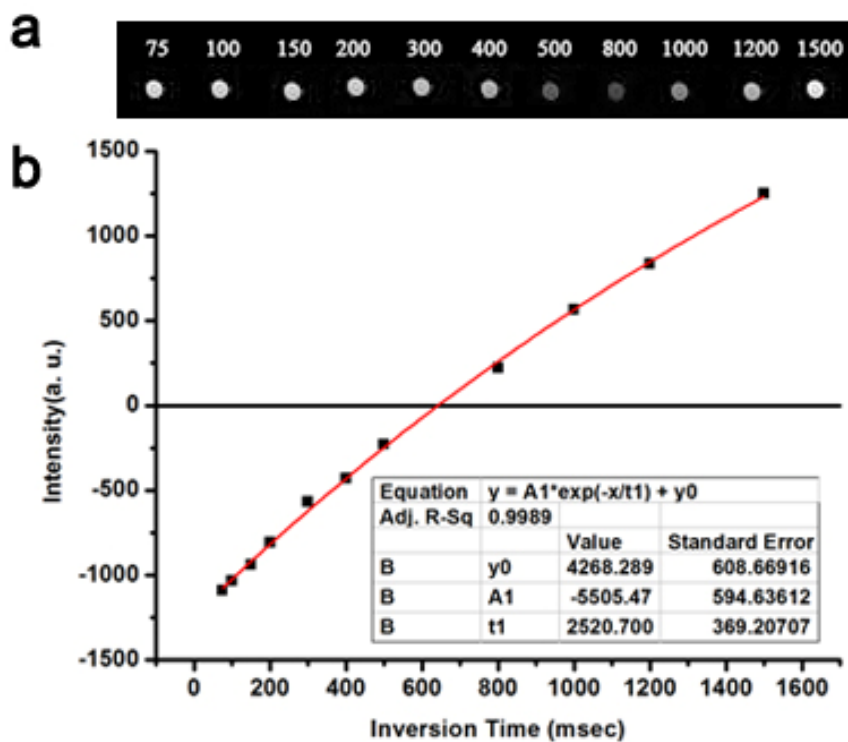

**Figure S8.** Plotted curves and fitting results of signal intensity versus inversion time of 0.2 M PB buffer (pH 7.4) on a 3 T MR scanner.



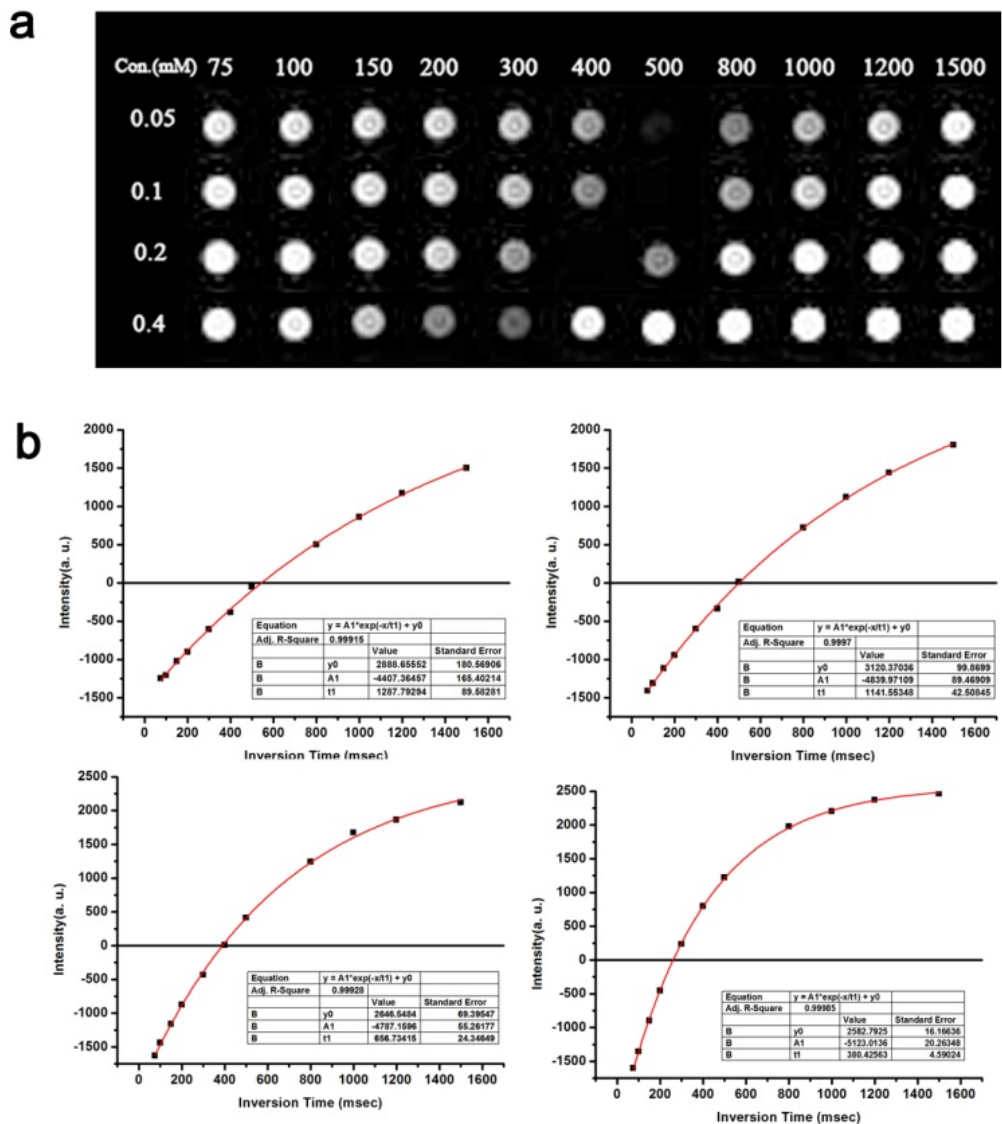

**Figure S9.** (a)  $T_1$ -weighted MR phantom images of **1** at 0.05 mM (first lane), 0.1 mM (second lane), 0.2 mM (third lane), 0.4 mM (fourth lane) in 0.2 M PB buffer (pH 7.4). Images were obtained on a 3 T MR scanner and the inversion time (ms) are shown above the phantom images. (b) Plotted curves and fitting results of signal intensity versus inversion time from Fig. S9a of different lanes: first lane (upper left), second lane (upper right), third lane (bottom left), fourth lane (bottom right).

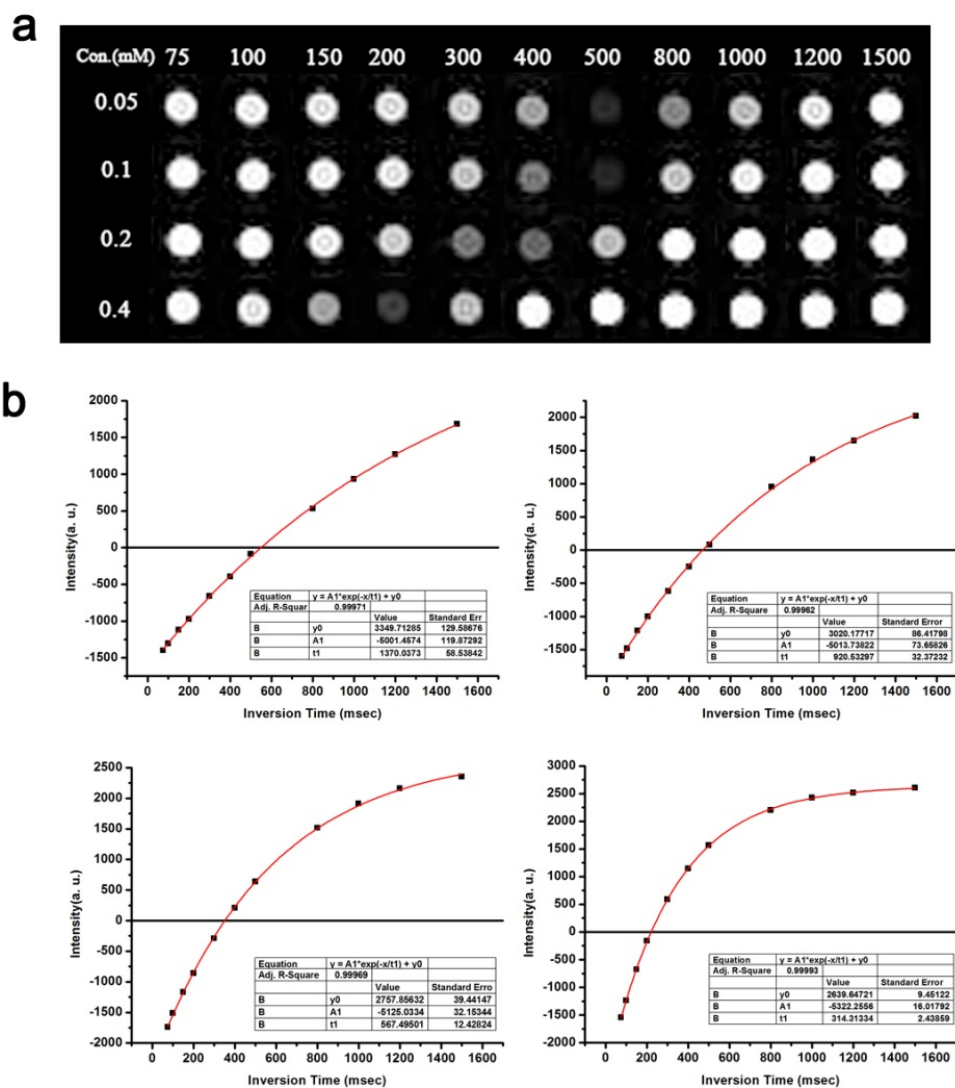

**Figure S10.** (a)  $T_1$ -weighted MR phantom images of **1-Scr** at 0.05 mM (first lane), 0.1 mM (second lane), 0.2 mM (third lane), 0.4 mM (fourth lane) in 0.2 M PB buffer (pH 7.4). Images were obtained on a 3 T MR scanner and the inversion time (ms) are shown above the phantom images. (b) Plotted curves and fitting results of signal intensity versus inversion time from Fig. S10a of different lanes: first lane (upper left), second lane (upper right), third lane (bottom left), fourth lane (bottom right).

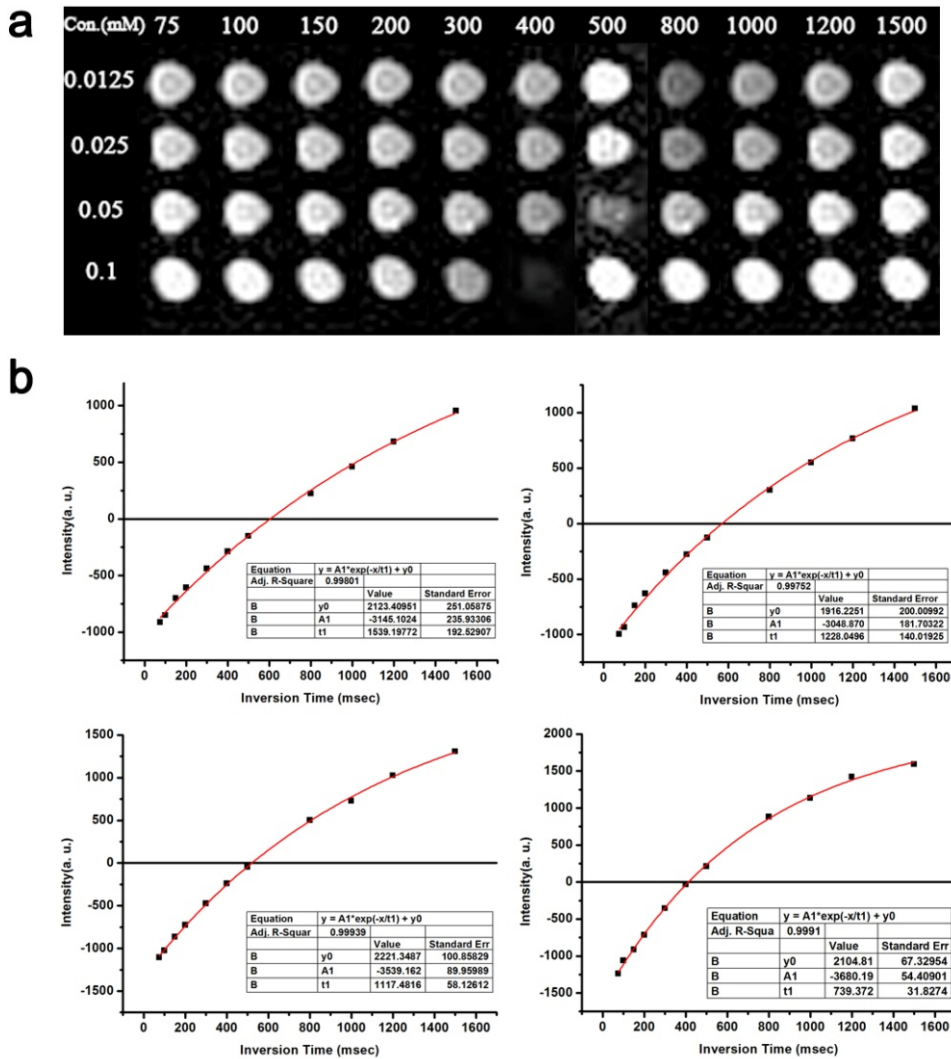

**Figure S11.** (a)  $T_1$ -weighted MR phantom images of **1-D** at 0.0125 mM (first lane), 0.025 mM (second lane), 0.05 mM (third lane), 0.1 mM (fourth lane) in 0.2 M PB buffer (pH 7.4, 1.5 % DMSO). Images were obtained on a 3 T MR scanner and the inversion time (ms) are shown above the phantom images. (b) Plotted curves and fitting results of signal intensity versus inversion time from Fig. S11a of different lanes: first lane (upper left), second lane (upper right), third lane (bottom left), fourth lane (bottom right).

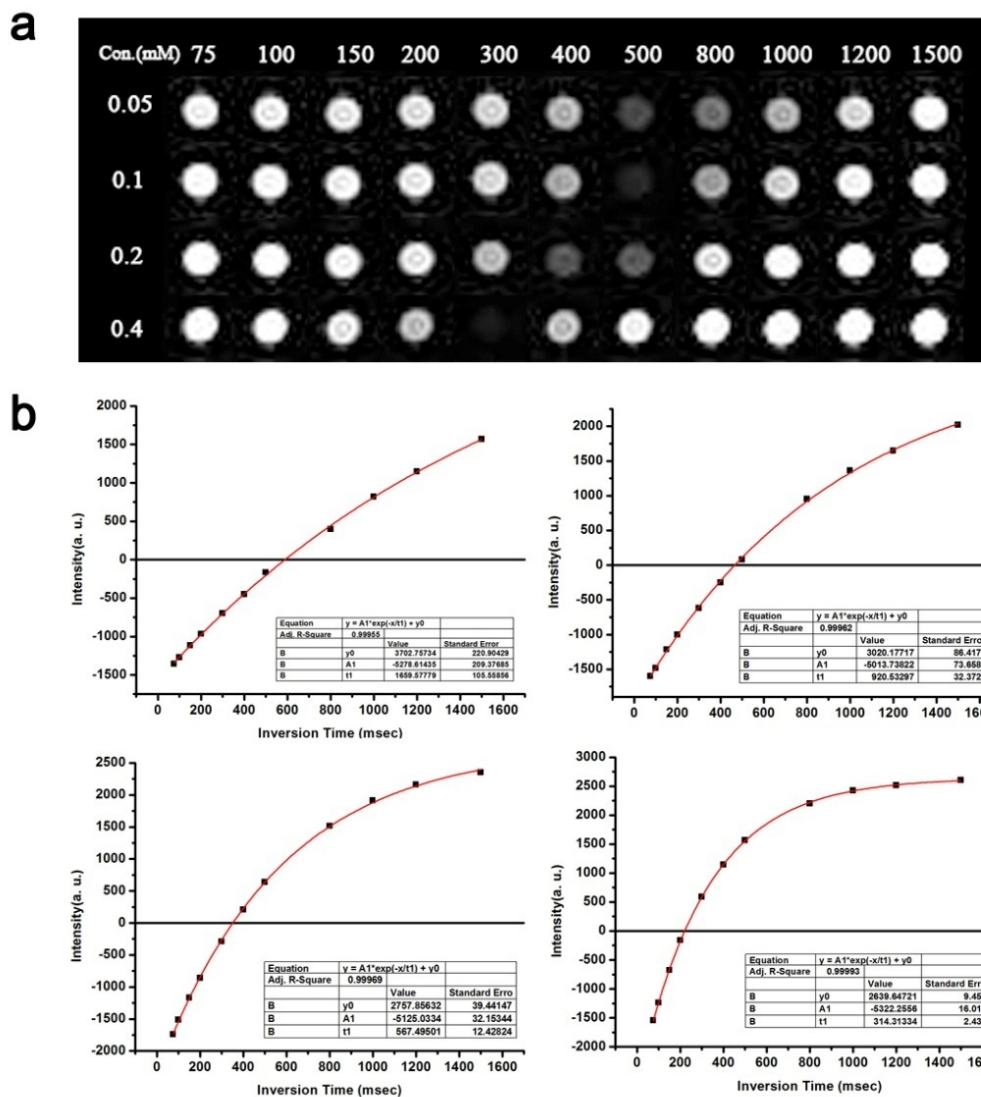

**Figure S12.** (a)  $T_1$ -weighted MR phantom images of Gd-DTPA (Magnevist) at 0.05 mM (first lane), 0.1 mM (second lane), 0.2 mM (third lane), 0.4 mM (fourth lane) in 0.2 M PB buffer (pH 7.4). Images were obtained on a 3 T MR scanner and the inversion time (ms) are shown above the phantom images. (b) Plotted curves and fitting results of signal intensity versus inversion time from Fig. S12a of different lanes: first lane (upper left), second lane (upper right), third lane (bottom left), fourth lane (bottom right).

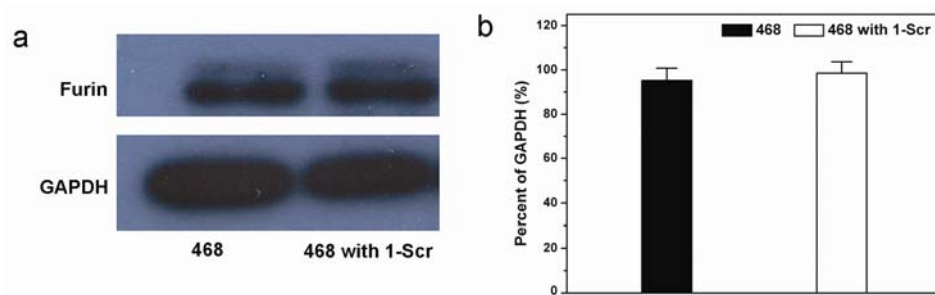

**Figure S13.** Western blot analysis (a) and quantification (b) of furin expression in MDA-MB-468 cells before and after incubation with **1-Scr** at 100  $\mu$ M for 8 h. Expression level of furin in cells treated with **1-Scr** did not show obvious change (98.5% of GAPDH), compared with that in cells untreated (95.2% of GAPDH,  $p = 0.631$ ).

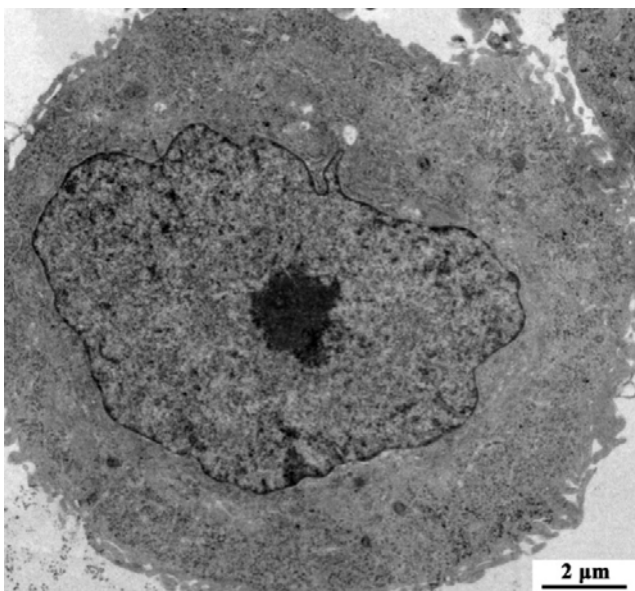

**Figure S14.** Electron microscopic image of sections of MDA-MB-468 cells incubated with **1-Scr** at 100  $\mu$ M for 8 h. Scale bar: 2  $\mu$ m.

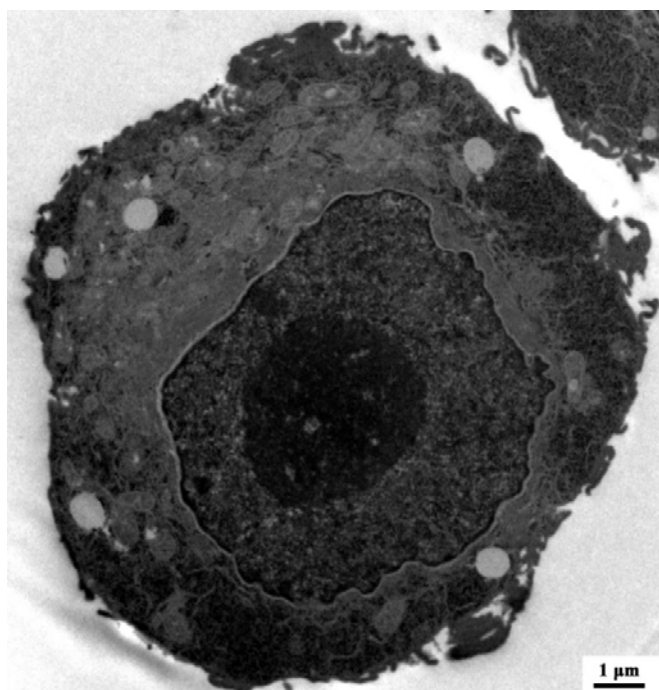

**Figure S15.** Electron microscopic image of sections of MDA-MB-468 cells untreated as negative control. Scale bar: 1  $\mu$ m.

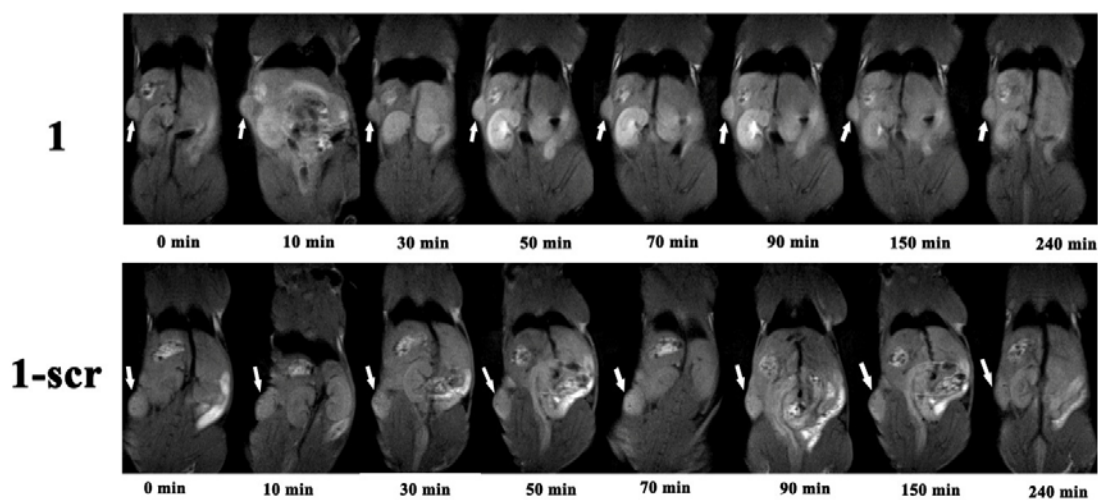

**Figure S16.** Representative coronal MR images of mice with subcutaneously xenografted MDA-MB-468 tumors at 0 min (pre-injection), 10 min, 30 min, 50 min, 70 min, 90 min, 150 min, and 240 min after two intravenous injections of **1** (upper) or **1-Scr** (lower) via tail veins (1<sup>st</sup> injection: 0.15 mmol/kg at 0 min; 2<sup>nd</sup> injection: 0.15 mmol/kg at 50 min). Tumors are indicated by arrows.

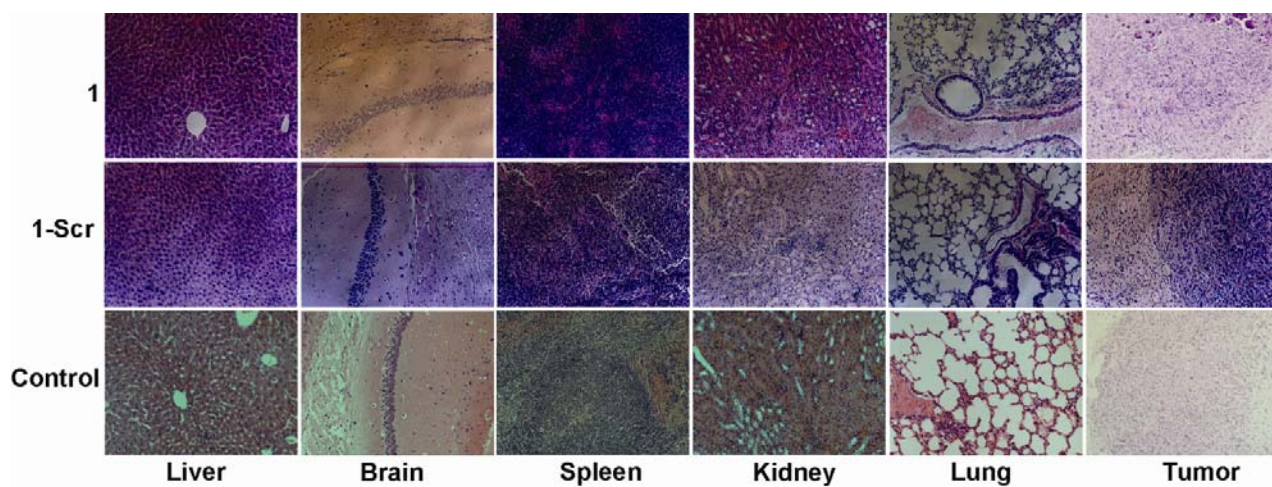

**Figure S17.** Hematoxylin and eosin (HE) staining of tissue slices of mice untreated (lower, Control), injected with **1** (upper) or **1-Scr** (middle) after 240 min of MRI.

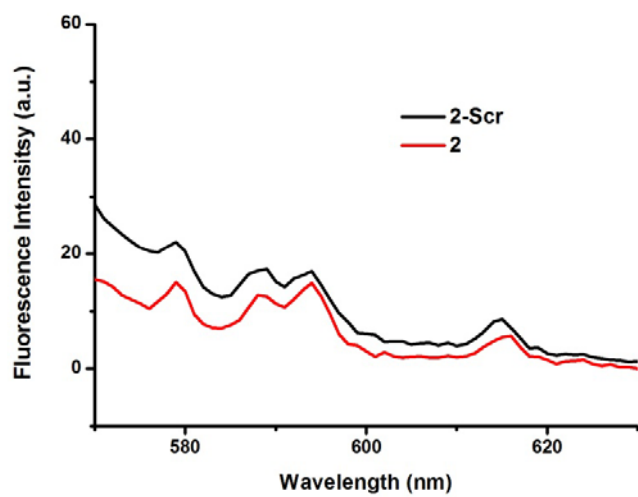

**Figure S18.** Fluorescence emission spectra of **2** and **2-scr** excited at 355 nm.

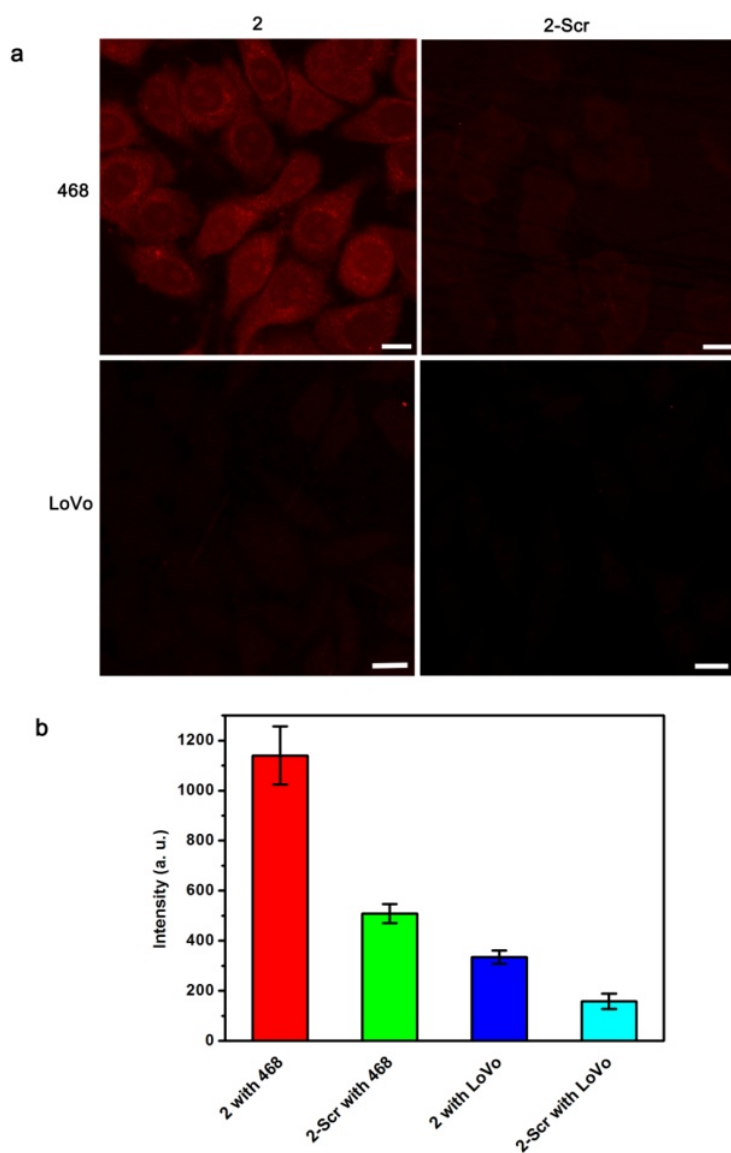

**Figure S19.** (a) TPLM images ( $\lambda_{\text{ex}} = 725 \text{ nm}$ ,  $\lambda_{\text{em}} = 565\text{-}636 \text{ nm}$ ) of MDA-MB-468 cells (upper) and LoVo (bottom) cells incubated with **2** (left) or **2-Scr** (right) at  $100 \mu\text{M}$  for 8 h and then rinsed and fixed prior to imaging. Scale bar:  $20 \mu\text{m}$ . (b) Quantification of the average fluorescence intensity of cell images in Figure S19a.



**Table S1.** The contents of Gd ( $\mu\text{g/g}$ , determined with ICP-MS) in different organs of mice injected with **1** or **1-Scr** after 240 min of MRI.

|              | Lung            | Brain             | Liver           | Spleen          | Kidney          | Tumor             |
|--------------|-----------------|-------------------|-----------------|-----------------|-----------------|-------------------|
| <b>1-Scr</b> | 0.018           | 0.017             | 0.043           | 0.021           | 0.13            | 0.046             |
| <b>1</b>     | 0.26 $\pm$ 0.19 | 0.022 $\pm$ 0.018 | 2.24 $\pm$ 0.66 | 0.93 $\pm$ 0.18 | 0.55 $\pm$ 0.28 | 0.12 $\pm$ 0.0007 |

**Table S2.** HPLC condition for the purification of compound **1**, **1-Scr**, **2**, and **2-Scr**.

| Time (minute) | Flow (ml/min.) | H <sub>2</sub> O % | CH <sub>3</sub> OH % |
|---------------|----------------|--------------------|----------------------|
| 0             | 12.0           | 80                 | 20                   |
| 3             | 12.0           | 80                 | 20                   |
| 35            | 12.0           | 20                 | 80                   |
| 37            | 12.0           | 20                 | 80                   |
| 38            | 12.0           | 80                 | 20                   |
| 40            | 12.0           | 80                 | 20                   |

**Table S3.** HPLC condition for the analysis and purification of **1-D**.

| Time (minute) | Flow (ml/min.) | H <sub>2</sub> O % | CH <sub>3</sub> OH % |
|---------------|----------------|--------------------|----------------------|
| 0             | 1.0            | 90                 | 10                   |
| 3             | 1.0            | 90                 | 10                   |
| 55            | 1.0            | 30                 | 70                   |
| 57            | 1.0            | 30                 | 70                   |
| 58            | 1.0            | 90                 | 10                   |
| 60            | 1.0            | 90                 | 10                   |

## Supplementary Methods

### Chemical syntheses and characterizations of **1**, **1-Scr**, **2**, **2-Scr**, and **1-D**.

The preparations of compound **1**, **1-Scr**, **2**, **2-Scr**, and **1-D** was described as below; 2-cyano-6-aminobenzothiazole (CBT) was synthesized following the literature method (White, E. H., Worther, H., Seliger, H. H., McElory, W. D. Amino analogs of firefly luciferin and biological activity thereof. *J. Am. Chem. Soc.* 1966, 88, 2015-2019). Compound **K** was synthesized following the literature method (Liang, G. L., Ronald, J., Chen, Y. X., Ye, D. J., Controlled self-assembling of gadolinium nanoparticles as smart molecular magnetic resonance imaging contrast agents. *Angew. Chem. Int. Ed.* 2011, 123, 6407-6410).

### Scheme S1. Synthetic route for **1**.

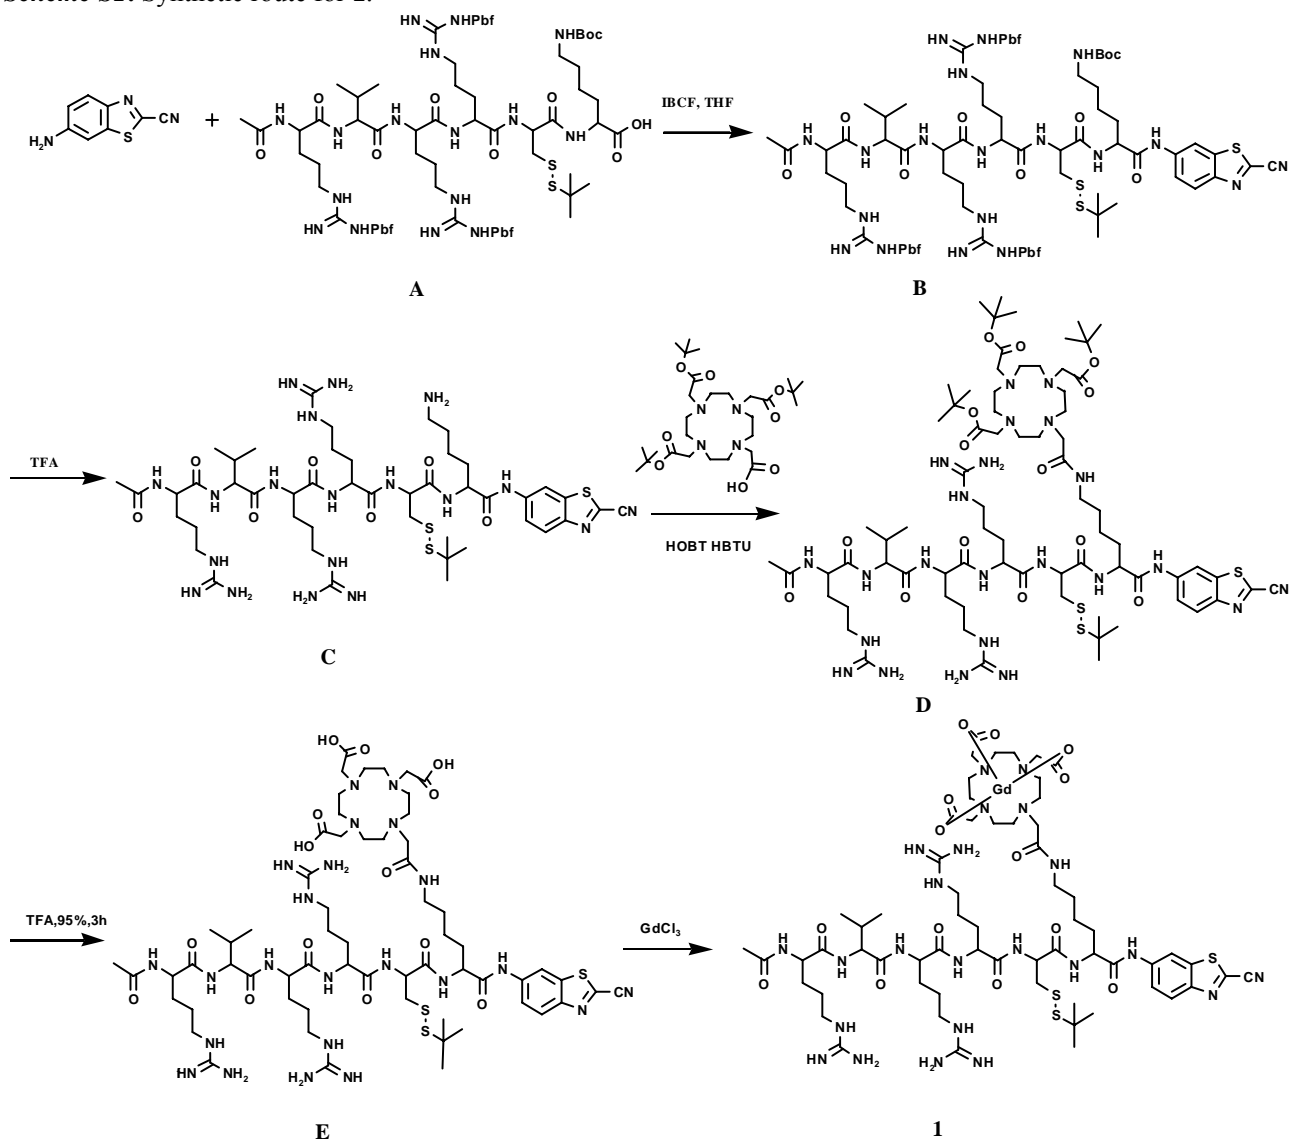

*Synthesis of compound B:* The isobutyl chloroformate (82 mg, 0.6 mmol) was added to the mixture of peptide **A** (1024 mg, 0.6 mmol) and MMP (4-methylmorpholine, 101mg, 1.0 mmol) in THF (5.0 mL) at 0 °C under  $N_2$  and the

reaction mixture was stirred at this temperature for 20 min. The solution of 2-cyano-6-aminobenzothiazole (105 mg, 0.6 mmol) was added to the reaction mixture and stirred for further 2 h at 0 °C then overnight at room temperature. Water (30 mL) was added and the reaction mixture was extracted with ethyl acetate (2 × 100 mL). The combined organic phase was dried by Na<sub>2</sub>SO<sub>4</sub> and then evaporated. The pure product **B** (yield: 28 %) was obtained after normal flash chromatography (eluent: AcOEt : Hexane = 1 : 1).

*Synthesis of compound D:* The protecting groups 2,2,4,6,7-pentamethyldihydrobenzofuran-5-sulfonyl (Pbf) and t-butoxycarbonyl (Boc) of compound **B** were removed with 100 % TFA for 3 h. Compound **C** was obtained after HPLC purification (yield: 70 %). The mixture of **C** (93.2 mg, 0.05 mmol), Tri-*tert*-butyl 1,4,7,10-tetraazacyclododecane-1,4,7,10-tetraacetate (DOTA(OtBu)<sub>3</sub>) (28.6 mg, 0.05 mmol) and O-Benzotriazole-N,N,N',N'-tetramethyl-uronium-hexafluoro-phosphate (HBTU) (18.9 mg, 0.05 mmol) in Dimethylformamide (DMF) (5.0 mL) was stirred overnight in presence of N,N-Diisopropylethylamine (DIPEA) (16.7 mg, 0.15 mmol). The pure product of **D** was obtained after HPLC purification (yield: 80 %). MS: calc. M<sup>+</sup> = 1656.9, obsvd. ESI-MS: m/z 1657.1 [M<sup>+</sup>].

*Synthesis of E:* The OtBu protecting groups of **D** were removed with 100% TFA for 3 h, purified with HPLC to yield compound **E**. <sup>1</sup>H NMR of compound **E** (CD<sub>3</sub>OD, 300 MHz): 9.10 (s, 1 H), 8.58 (d, 1 H), 8.24 (d-d, 1 H, J = 9.0 Hz), 7.31(s, 1 H), 4.83-4.56 (m, 3 H), 4.51 (m, 2 H), 4.38-4.09 (m, 6 H), 4.00 (m, 12 H, J = 21 Hz), 3.83-3.44 (m, 18 H), 3.43-3.24 (m, 6 H), 2.63 (m, 2 H), 2.32-2.14 (m, 6 H), 2.14-2.00 (m, 8 H), 1.93 (s, 1 H), 1.87 (s, 1 H), 1.77 (s, 6 H), 1.70 (m, 3 H), 1.58 (t, 16 H, J = 14.1 Hz), 1.37 (m, 6 H). MS: calc. M<sup>+</sup> = 1488.7, obsvd. ESI-MS: m/z 1488.8 [M<sup>+</sup>].

*Preparation of compound I:* Compound **E** (14.9 mg, 0.01 mmol) was dissolved in water and the pH value of this solution was adjusted to 6-7. GdCl<sub>3</sub>·6H<sub>2</sub>O (37.1 mg, 0.1 mmol) was added into above solution and stirred for 3h at room temperature. Pure compound **1** was obtained after HPLC purification (yield: 70 %). MS: calc. M<sup>+</sup> = 1644.1, obsvd. MALDI-MS: m/z 1644.8 [(M+H)<sup>+</sup>].

**Scheme S2: Synthetic route for 1-Scr**

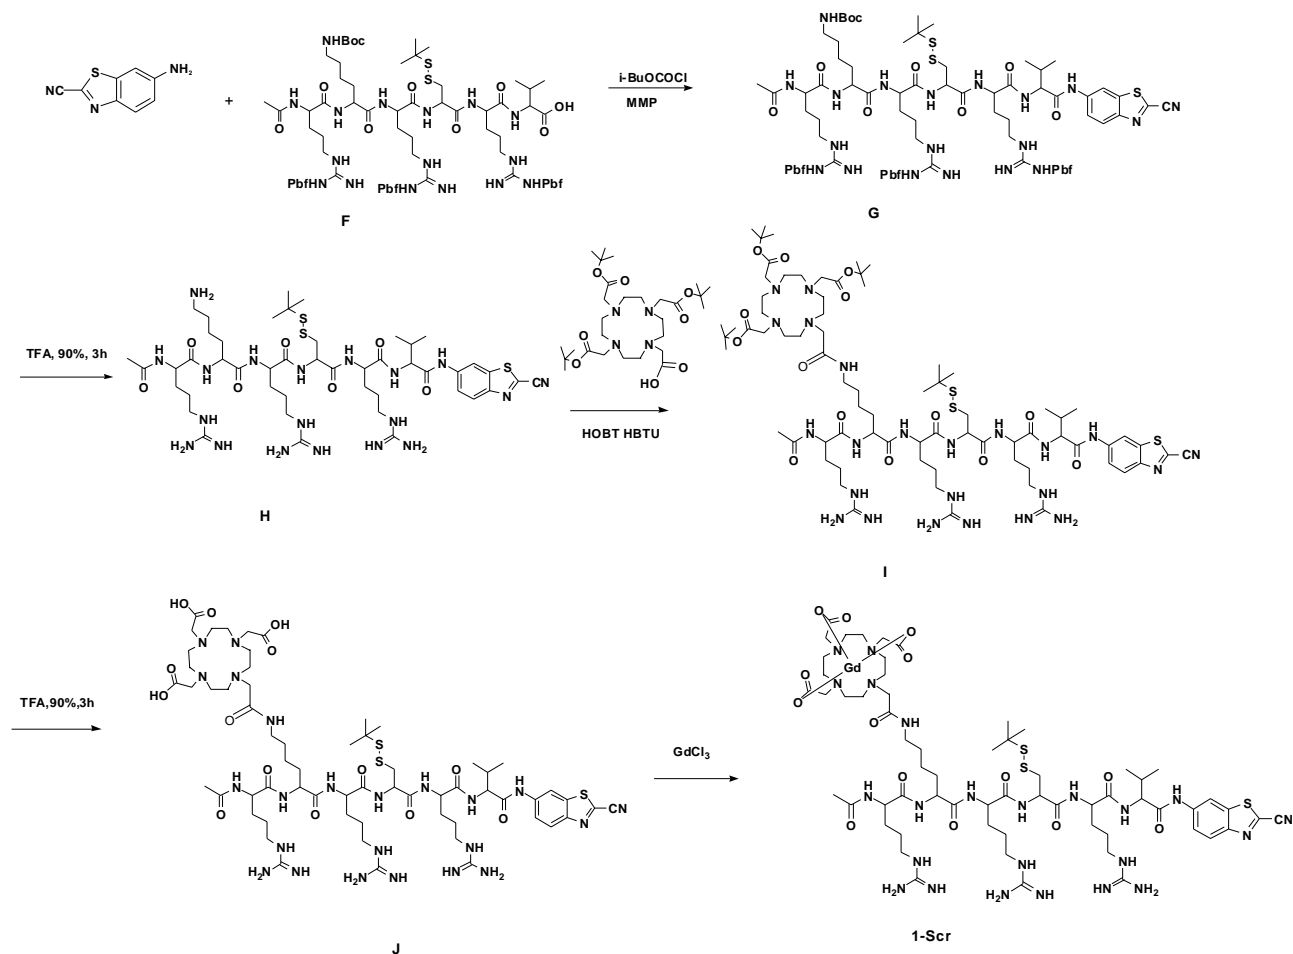

**Synthesis of compound G:** The isobutyl chloroformate (82 mg, 0.6 mmol) was added to the mixture of peptide **F** (1024 mg, 0.6 mmol) and MMP (4-methylmorpholine, 101mg, 1.0 mmol) in THF (5.0 mL) at 0 °C under N<sub>2</sub> and the reaction mixture was stirred at this temperature for 20 min. The solution of 2-cyano-6-aminobenzothiazole (105 mg, 0.6 mmol) was added to the reaction mixture and stirred for further 2 h at 0 °C then overnight at room temperature. Water (30 mL) was added and the reaction mixture was extracted with ethyl acetate (2 × 100 mL). The combined organic phase was dried by Na<sub>2</sub>SO<sub>4</sub> and then evaporated. The pure product **G** (yield: 35 %) was obtained after normal flash chromatography (eluent: AcOEt : Hexane = 1 : 1).

**Synthesis of compound I:** The protecting groups Pbf and Boc of compound **G** were removed using 100% TFA for 3 h, purified by HPLC to yield compound **H** (yield: 70 %). The mixture of **H** (93.2 mg, 0.05 mmol), Tri-*tert*-butyl 1,4,7,10-tetraazacyclododecane-1,4,7,10-tetraacetate (DOTA(OtBu)<sub>3</sub>) (28.6 mg, 0.05 mmol) and HBTU (18.9 mg, 0.05 mmol) in DMF (5.0 mL) was stirred overnight in the presence of DIPEA (16.7 mg, 0.15 mmol). Pure compound of **I** was obtained after HPLC purification (yield: 75 %). MS: calc. M<sup>+</sup> = 1656.9, obsvd. ESI-MS: m/z 1657.0 [M<sup>+</sup>].

**Synthesis of compound J:** The OtBu protecting groups of **I** were removed with 100% TFA for 3 h and purified with HPLC to yield compound **J**. <sup>1</sup>HNMR of compound J (CD<sub>3</sub>OD, 300 MHz): (CD<sub>3</sub>OD, 300 MHz): 9.10 (s, 1 H), 8.58 (d,

1 H), 8.24 (d-d, 1 H, J = 9.0 Hz), 7.31(s, 1 H), 5.81 (m, 2 H), 4.91-4.80 (m, 1 H), 4.83-4.56 (m, 3 H), 4.51 (m, 2 H), 4.38-4.09 (m, 4 H), 4.00 (m, 12 H, J = 21 Hz), 3.82-3.46 (m, 18 H), 3.46-3.35 (m, 2 H), 3.24 (s, 3 H), 2.63 (m, 3 H), 2.32-2.14 (m, 6 H), 2.14-2.00 (m, 8 H), 1.93 (s, 1 H), 1.87 (s, 1 H), 1.77 (s, 5 H), 1.70 (m, 4 H), 1.58 (t, 15 H, J = 14.1 Hz), 1.37 (m, 6 H). MS: calc.  $M^+ = 1488.7$ , obsvd. ESI-MS:  $m/z$  1488.6 [ $M^+$ ].

*Preparation of compound 1-scr:* Compound **J** (14.9 mg, 0.01 mmol) was dissolved in 5 ml water and pH value of this solution was adjusted to 6-7.  $GdCl_3 \cdot 6H_2O$  (37.1 mg, 0.1 mmol) was added into above solution and stirred for 3h at room temperature. Pure compound **1-scr** was obtained after HPLC purification (yield: 70 %). MS: calc.  $M^+ = 1644.1$ , obsvd. MALDI-MS:  $m/z$  1644.8 [ $(M+H)^+$ ].

*Synthesis of compound 2:* Synthetic route for **2** is similar to that of **1**, except  $GdCl_3 \cdot 6H_2O$  at the last step of synthesis of **1** was replaced with  $EuCl_3 \cdot 6H_2O$ . MS for **2**: calc.  $M^+ = 1638.7$ , obsvd. ESI-MS:  $m/z$  1638.4 [ $M^+$ ].

*Synthesis of compound 2-scr:* Synthetic route for **2-scr** is similar to that of **1-scr**, except  $GdCl_3 \cdot 6H_2O$  at the last step of synthesis of **1-scr** was replaced with  $EuCl_3 \cdot 6H_2O$ . MS for **2-scr**: calc.  $M^+ = 1638.7$ , obsvd. MS (ESI):  $m/z$  1638.6 [ $M^+$ ].

**Scheme 3:** Synthetic route for **1-D**

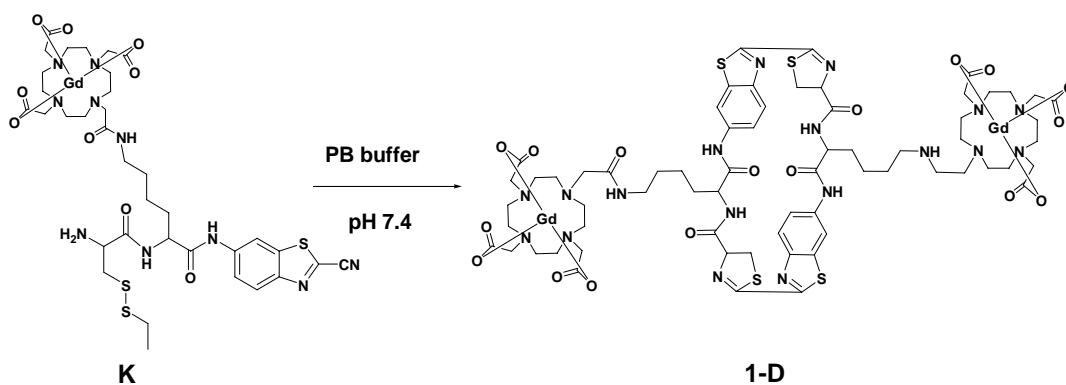

*Synthesis of compound 1-D:* Compound **K** was dissolved in 0.2 M phosphate buffer to make a 1 mM solution. 4 equiv. of TCEP was added into above solution and stirred for 1 h at room temperature. Pure compound of **1-D** was obtained after HPLC purification. MS: calc.  $M^+ = 1860.36$ , obsvd. ESI-MS:  $m/z$  1860.24 [ $M^+$ ].
